# Supplementary material for: Prevalence and incidence of HIV among female sex workers and their clients: modelling the potential effects of intervention in Rwanda
Source: PubMed Central journal article supplement — BMJ Glob Health. 2020 Aug 6;5(8):e002300. doi: 10.1136/bmjgh-2020-002300 (PMC7412619; doi:10.1136/bmjgh-2020-002300), 2020-08-06
Supplement: bmjgh-2020-002300supp001.pdf [file bmjgh-2020-002300supp001.pdf]

**Supplementary material for “Projected prevalence and incidence of HIV among female sex workers and sex clients in Rwanda: a Markov model examining intervention effects”**

### Description of algorithm

1. *Initialization*: starting with a perceived present state distribution of the different sub-populations (FSWs, sex clients and general public) and the states described in the *Model description* section across the Rwandan population. Initial values for average number of partners and number of acts per partner for the different populations were chosen to match estimated HIV incidence at present time.
2. *Progression*: for each year between 2017 and 2027, the following steps are repeated –
  - i. Update transmission probabilities according to Equations (1) - (4) in the “Rwanda FSW HIV model - Supplementary material - HIV Transmission Probabilities - v2.1” attachment, and the subsequent transition probabilities between states.
  - ii. Re-distribute the three sub-populations across the different states, according to the updated transition probabilities.
  - iii. Update the number of different male partners each FSW encounters annually, to match the updated male partners population.
  - iv. Calculate the number of newborns, to match Rwanda’s population growth rate statistics.
  - v. Draw a random sample of retired FSWs (to be joining the general public), whose number is derived from the life expectancy in Rwanda, to reflect retirement on reaching a certain age, and another random sample of newly recruited FSWs from the general public, using similar principles.
  - vi. Similarly, swap individuals between the general public and the sex clients group.
  - vii. Update population groups:
    - $FSWs = FSWs^* - FSW \text{ retirement} + FSW \text{ recruitment}$
    - $SCs = SCs^* - SCs \text{ retirement} + SCs \text{ recruitment}$
    - $GP = GP^* - FSWs \text{ recruitment} + FSWs \text{ recruitment} - SCs \text{ recruitment} + SCs \text{ retirement}$

where we use SCs and GP for sex clients and general public, respectively, and the \* superscript denotes the re-distributed population according to the calculated transition probabilities.

## HIV transmission probabilities

We consider three populations: female sex workers (FSWs), their male sex clients, and the general population, which is divided into the subgroups male and female. For each underlying population, a Markov chain, depicted in (1), is considered with the state space consisting of the following six states:

- HIV negative (HIV-)
- HIV positive (HIV+) undiagnosed
- HIV+ diagnosed pre-ART
- HIV+ diagnosed on ART with viral suppression
- HIV+ diagnosed on ART with virological failure. This includes both cases of the failure of an alternative treatment, as well as the failure due to not adhering to the treatment.
- Death

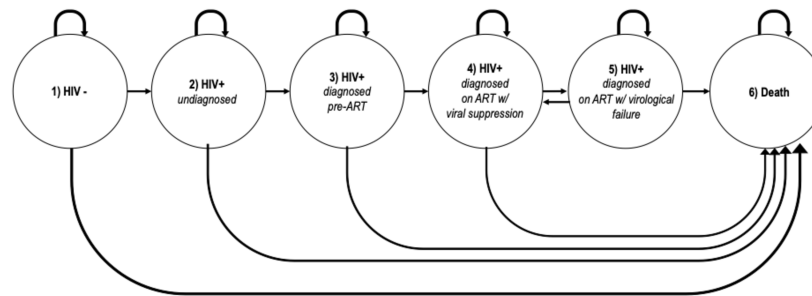

Figure 1: HIV Transmission Markov Model

**Acronyms:** HIV, *human immunodeficiency virus*; ART, *antiretroviral therapy*; “+”, *positive*, and “-”, *negative*.

Transition probabilities among the states is computed using the mortality rate, incidence rate, HIV testing rate, percentage of people selecting to start ART, ART failure rate, mortality rate for the ART patients with non-suppressed viral load, percentage of people starting an alternative ART, and the failure rate for the alternative ART, which we derived from the data set that was available to us (see Supplementary Table 1).

Let  $A_i$  be the event that an individual (male or female) does not become infected with HIV over the period, he (or she) is having intercourse with partner number  $i$ . We denote the number of intimate partners for each individual, over his (or her) lifetime, with  $n \geq 1$ . For simplicity, a fixed number of sex acts per partner is assumed for each individual, and is denoted by  $l$ . Assuming  $A_1, A_2, \dots, A_n$  are independent, we can therefore compute the probability ( $p$ ) of HIV transmission through intercourse for each individual, within a specific population group, as follows:

$$\begin{aligned}
 p &\triangleq P\left(\bigcup_{i=1}^n A_i^c\right) = 1 - P\left(\bigcap_{i=1}^n A_i\right) \\
 &= 1 - \prod_{i=1}^n P(A_i) \\
 &= 1 - (P(A_1))^n.
 \end{aligned} \tag{1}$$

Given the states in our Markov chain model, a healthy individual could become infected with HIV through having intercourse with a HIV positive partner pre-ART, or with a HIV positive partner virally suppressed on ART, or with a HIV positive partner not virally suppressed on ART.

Let  $B$  be the event that the healthy individual becomes infected with HIV in a single sex act,  $C_0$  be the event that his (or her) partner is HIV negative,  $C_1$  be the event that his (or her) partner is HIV positive pre-ART,  $C_2$  be the event that his (or her) partner is HIV positive virally suppressed on ART, and  $C_3$  be the event that his (or her) partner is HIV positive virally unsuppressed on ART. Therefore,

$$P(A_1) = P(C_0) + (1 - P(B|C_1))^l P(C_1) + (1 - P(B|C_2))^l P(C_2) + (1 - P(B|C_3))^l P(C_3). \tag{2}$$

Let  $D_1$  be the event that the HIV transmission is through vaginal sex, and  $D_2$  be the event that the HIV transmission is through anal sex. We denote the event that a preventative measure such as condom or PrEP is used in the sex act by  $E$ . The efficacy of such preventative measure is then denoted by  $e$ . For all  $j = 1, 2, 3$ , we compute  $P(B|C_j)$  as follows:

$$P(B|C_j) = (1 - e)P(E) \left[ P(B|C_j, D_1)P(D_1) + P(B|C_j, D_2)P(D_2) \right]. \tag{3}$$

Let  $E_1$  be the event that only condom has been used as the preventative measure during the sex act, and  $E_2$  be the event that only PrEP has been used as the preventative measure during the sex act.

$$\begin{aligned}
 P(E) &= P(E_1 \cup E_2) \\
 &= P(E_1) + P(E_2) - P(E_1 \cap E_2).
 \end{aligned} \tag{4}$$

## Supplementary tables

Supplementary Table 1. Demographic parameters for the study Markov model

| Parameter                            | Estimate type | Base value | Lower bound | Upper bound | Source                                                  | Comments                                                                                             |
|--------------------------------------|---------------|------------|-------------|-------------|---------------------------------------------------------|------------------------------------------------------------------------------------------------------|
| <b>All population</b>                |               |            |             |             |                                                         |                                                                                                      |
| Total size                           | N             | 11,809,264 | --          | --          | NISR 2015 <sup>1</sup>                                  | Census data                                                                                          |
| HIV-                                 | N             | 11,467,068 | 11,395,940  | 11,502,223  | NISR 2015 <sup>1</sup> ; UNAIDS 2016 <sup>2</sup>       | Calculated using estimated HIV prevalence: 3.1% (2.6-3.5%)                                           |
| HIV+                                 | N             | 342,196    | 307,041     | 413,324     | UNAIDS 2016 <sup>2</sup>                                | Calculated using estimated HIV prevalence: 3.1% (2.6-3.5%)                                           |
| Diagnosed HIV                        | N             | 317,859    | 233,351     | 392,658     | UNAIDS 2016 <sup>2</sup>                                | Number of people living with HIV who know their status (87%, 76%-95%)                                |
| Undiagnosed HIV                      | N             | 24,337     | --          | 179,973     | UNAIDS 2016 <sup>2</sup>                                | Difference between HIV+ and diagnosed.                                                               |
| ART coverage in Rwanda               | %             | 80%        | 69%         | 89%         | UNAIDS 2016 <sup>2</sup>                                | Reported % of adults and children receiving ART                                                      |
| HIV+ on ART                          | N             | 305,985    | 161,012     | 349,466     | UNAIDS 2016 <sup>2</sup>                                | Calculated using % of ART coverage – 80% (95% CI: 69-89%)                                            |
| HIV+ with viral suppression on ART   | N             | 156,679    | 112,499     | 244,172     | UNAIDS 2016 <sup>2</sup> ; Nsanzimana 2015 <sup>3</sup> | Calculated using % of patients who achieve viral suppression on ART (82.2%), assuming 85% adherence. |
| HIV+ with failed or discontinued ART | N             | 161,180    | --          | 236,966     | UNAIDS 2016 <sup>2</sup> ; Nsanzimana 2015 <sup>3</sup> | Difference between ART and ART with viral suppression.                                               |
| HIV+ pre-ART                         | N             | 11,874     | --          | 231,646     | UNAIDS 2016 <sup>2</sup>                                | Calculated subtracting the number of HIV+ on ART from the HIV diagnosed                              |
| <b>FSW population</b>                |               |            |             |             |                                                         |                                                                                                      |
| Total size                           | N             | 47,750     | 25,000      | 111,000     | ESPHS Rwanda 2011 <sup>4</sup>                          | Household survey data: 45000 (25000-111000)                                                          |
| HIV-                                 | N             | 25,964     | 14,500      | 49,395      | BBSS SW Rwanda 2016 <sup>5</sup>                        | Calculated by subtracting number of HIV+                                                             |

| Parameter                            | Estimate type | Base value | Lower bound | Upper bound | Source                           | Comments                                                                                                                   |
|--------------------------------------|---------------|------------|-------------|-------------|----------------------------------|----------------------------------------------------------------------------------------------------------------------------|
| HIV prevalence                       | %             | 46%        | 42%         | 55%         | BBSS SW Rwanda 2016 <sup>5</sup> | National prevalence of HIV: 46%, HIV prevalence in Kigali (55%) and other provinces (42%) taken for upper and lower ranges |
| HIV+                                 | N             | 21,786     | 10,500      | 61,605      | BBSS SW Rwanda 2016 <sup>5</sup> | Calculated using HIV prevalence rate of FSWs: 46% (42-55.5%)                                                               |
| Diagnosed HIV                        | N             | 20,803     | 7,980       | 58,525      | BBSS SW Rwanda 2016 <sup>5</sup> | Calculated using % of those who are HIV+ and diagnosed (87%; 95% CI: 76 - 95%)                                             |
| Undiagnosed HIV                      | N             | 983        | --          | 53,625      | BBSS SW Rwanda 2016 <sup>5</sup> | Calculated by subtracting number of diagnosed HIV                                                                          |
| ART coverage for FSW in Rwanda       | %             | 78.4%      | 74.2%       | 82.3%       | BBSS SW Rwanda 2016 <sup>5</sup> | Reported % of FSWs on ART at diagnosis: 74.8% (74.2-82.3%)                                                                 |
| HIV+ on ART                          | N             | 20,032     | 7791        | 50,701      | BBSS SW Rwanda 2016 <sup>5</sup> | Calculated using % of ART coverage for FSW: 78.4% (74.2-82.3%)                                                             |
| HIV+ with viral suppression on ART   | N             | 9,940      | 5,444       | 35,425      | BBSS SW Rwanda 2016 <sup>5</sup> | Calculated using % of patients who achieve viral suppression on ART (82.2%), assuming 85% adherence.                       |
| HIV+ with failed or discontinued ART | N             | 10,092     | --          | 45,257      | BBSS SW Rwanda 2016 <sup>5</sup> | Calculated by subtracting number of FSWs without viral suppression on ART                                                  |
| HIV+ pre-ART                         | N             | 771        | --          | 50,734      | BBSS SW Rwanda 2016 <sup>5</sup> | Calculated by subtracting number of FSWs with diagnosed HIV on ART                                                         |
| <b>Sex client population</b>         |               |            |             |             |                                  |                                                                                                                            |
| Total size                           | N             | 156,611    | 42,300      | 177,000     | ESPHS Rwanda 2011 <sup>4</sup>   | Estimated from Household survey data; used the highest number for base case                                                |
| HIV-                                 | N             | 133,808    | 38,916      | 141,600     | BBSS SW Rwanda 2016 <sup>5</sup> | Calculated by subtracting number of HIV+                                                                                   |
| HIV prevalence                       | %             | 15%        | 8%          | 20%         | BBSS SW Rwanda 2016 <sup>5</sup> | Assumed                                                                                                                    |

| Parameter                            | Estimate type | Base value | Lower bound | Upper bound | Source                                                  | Comments                                                                                             |
|--------------------------------------|---------------|------------|-------------|-------------|---------------------------------------------------------|------------------------------------------------------------------------------------------------------|
| HIV+                                 | N             | 22,803     | 3,384       | 35,400      | BBSS SW Rwanda 2016 <sup>5</sup>                        | Calculated using assumed HIV prevalence                                                              |
| Diagnosed HIV                        | N             | 18,637     | 2,572       | 33,630      | BBSS SW Rwanda 2016 <sup>5</sup>                        | Calculated using % of those who are HIV+ and diagnosed (87%; 95% CI: 76 - 95%)                       |
| Undiagnosed HIV                      | N             | 4,166      | --          | 32,828      | BBSS SW Rwanda 2016 <sup>5</sup>                        | Calculated by subtracting number of diagnosed HIV                                                    |
| HIV+ on ART                          | N             | 16,778     | 2,057       | 26,904      | UNAIDS 2016 <sup>2</sup>                                | Calculated using 80% of ART coverage                                                                 |
| HIV+ with viral suppression on ART   | N             | 9,815      | 1,438       | 18,798      | UNAIDS 2016 <sup>2</sup> ; Nsanzimana 2015 <sup>3</sup> | Calculated using % of patients who achieve viral suppression on ART (82.2%), assuming 85% adherence. |
| HIV+ with failed or discontinued ART | N             | 6,963      | --          | 25,466      | UNAIDS 2016 <sup>2</sup> ; Nsanzimana 2015 <sup>3</sup> | Calculated subtracting patients with suppressed viral load from the overall ART numbers.             |
| HIV+ pre-ART                         | N             | 1,859      | --          | 31,573      | UNAIDS 2016 <sup>2</sup>                                | Calculated by subtracting Diagnosed HIV with HIV+ on ART                                             |

The base values used for the 2017-2027 model run were the output values for the 2010-2017 validation period.

**Supplementary Table 2. Transition probabilities between health states, population growth and mortality rates, and HIV transmission probabilities**

| Parameter                                                                 | Estimate type | Base value | Lower bound | Upper bound | Source                                                    | Comments                                                                                                          |
|---------------------------------------------------------------------------|---------------|------------|-------------|-------------|-----------------------------------------------------------|-------------------------------------------------------------------------------------------------------------------|
| <b>Transition probabilities between HIV health states</b>                 |               |            |             |             |                                                           |                                                                                                                   |
| Probability of being tested for HIV among FSWs                            | %             | 71.0%      | 70.6%       | 74.4%       | BBSS SW Rwanda 2016 <sup>5</sup>                          | 70.6 - 74.4% reported being tested for HIV; took the lower bound as the base case as this is likely over-reported |
| Probability of being tested for HIV among general population              | %             | 46.0%      | 44.5%       | 47.3%       | RAIHIS 2013-14 <sup>6</sup>                               | Assumed to be the same for male partners                                                                          |
| Probability of being on ART among FSWs                                    | %             | 80.0%      | 74.2%       | 82.3%       | BBSS SW Rwanda 2016 <sup>5</sup>                          | Percentage of those reporting yes to being enrolled on ART at HIV diagnosis                                       |
| Probability of being on ART among general population                      | %             | 80.0%      | 69.0%       | 89.0%       | UNAIDS, 2016 <sup>2</sup>                                 | Assumed to be the same for male partners                                                                          |
| Probability of viral suppression given ART                                | %             | 82.2%      | --          | --          | Nsanizimana 2015 <sup>7</sup>                             | Estimated from Electronic medical records; Assumed to be the same for all groups                                  |
| Probability of adhering to ART                                            | %             | 90.0%      | 85.1%       | 97.3%       | Elul 2013 <sup>8</sup> ; BBSS SW Rwanda 2015 <sup>5</sup> | BBSS SW Rwanda 2015 (88.9%, 95% CI: 85.1 - 92.2%)                                                                 |
| Probability of switching to second line ART                               | %             | 4.0%       | 3.8%        | 4.2%        | Nsanizimana 2015 <sup>7</sup>                             | Assumed to be the same who came back to care after being lost to follow-up at pre-ART                             |
| Probability of failing first line ART                                     | %             | 17.8%      | --          | --          | Nsanizimana 2015 <sup>7</sup>                             | Calculated using 100 – probability of viral suppression given ART (82.2%)                                         |
| Probability of switching to second line given failure of first line       | %             | 22.5%      | 21.3%       | 23.6%       | Nsanizimana 2015 <sup>7</sup>                             | Calculated using probability of switching divided by probability of failing first line ART (17.8%)                |
| Probability of going on ART given initial no ART                          | %             | 15.0%      | 25.1%       | 27.5%       | Nsanizimana 2015 <sup>7</sup>                             | % of those returning to ART                                                                                       |
| <b>Parameters related to population growth, demographics, and changes</b> |               |            |             |             |                                                           |                                                                                                                   |
| Proportion of females among Rwanda general population                     | %             | 51.0%      | --          | --          | World Bank 2016                                           | 100 to 196.17                                                                                                     |
| Annual growth rate                                                        | %             | 2.5%       | --          | --          | World Bank 2016                                           |                                                                                                                   |
| Annual mortality rate for HIV- individuals                                | %             | 0.6%       | --          | --          | World Bank 2016                                           | General mortality rate (assumed to be equivalent for FSWs and male partners)                                      |
| Annual mortality rate for virally suppressed HIV+ individuals             | %             | 1.0%       | 0.9%        | 1.1%        | Nsanizimana 2015 <sup>7</sup>                             | Estimated mortality rate for those HIV positive on ART (assumed to be equivalent for FSWs and male partners)      |



| Parameter                                                                    | Estimate type | Base value | Lower bound | Upper bound | Source                                                                       | Comments                                                                                                                                                                                                                                    |
|------------------------------------------------------------------------------|---------------|------------|-------------|-------------|------------------------------------------------------------------------------|---------------------------------------------------------------------------------------------------------------------------------------------------------------------------------------------------------------------------------------------|
| Annual mortality rate for HIV+ not virally suppressed or undiagnosed         | %             | 2.0%       | 2.0%        | 2.2%        | Nsanizimana 2015 <sup>7</sup>                                                | Assumed to equivalent to those with virological failure (assumed to be equivalent for FSWs and male partners)                                                                                                                               |
| <b>Parameters related to sexual intercourse</b>                              |               |            |             |             |                                                                              |                                                                                                                                                                                                                                             |
| Average number of sexual acts per sex client for FSWs                        | N             | 2.5        | 3.00        | 10.00       | Assumed                                                                      | Calibrated to present time incidence (Range assumed)                                                                                                                                                                                        |
| Average number of sex clients for FSWs (12 months)                           | N             | 52.00      | 26.00       | 104.00      | Assumed                                                                      | Calculated assuming one partner per week for base case (0.5/week for lower bound, and 2/week for upper bound)                                                                                                                               |
| Average number of sexual acts per partner for general population (12 months) | N             | 52         | 52.00       | 104.00      | Rwanda DHS <sup>1</sup>                                                      | Calculated assuming 1.5 intercourse per week with one partner for base value (1 intercourse per week for lower bound and 2 intercourse per week for upper bound)                                                                            |
| Average number of sexual partners for general population (12 months)         | N             | 1.2        | 1.50        | 2.70        | Rwanda DHS <sup>1</sup>                                                      | Assuming same as number of life time sexual partners (Range 1.5 - 2.7)                                                                                                                                                                      |
| Condom efficacy                                                              | %             | 100%       | 60%         | 100%        | Weller 2002 <sup>9</sup> , Jin 2009 <sup>10</sup> , Remis 2014 <sup>11</sup> | Base case assumed 100% if reported consistent condom use, the lower bound was determined by the estimates reported from different studies                                                                                                   |
| ART efficacy                                                                 | %             | 82.2%      | 60.0%       | 95.0%       | Nsanizimana 2015 <sup>7</sup>                                                |                                                                                                                                                                                                                                             |
| PrEP efficacy                                                                | %             | 93.0%      | 60.0%       | 99.0%       | Donnell 2014 <sup>12</sup>                                                   | 93% (95% CI: 60 - 99%)                                                                                                                                                                                                                      |
| Probability of condom use for sex workers                                    | %             | 25.0%      | 16.4%       | 28.3%       | BBSS SW Rwanda 2016 <sup>5</sup>                                             | Consistent condom use reported for last 30 days: 21.9% (95% CI: 16.4, 28.3%)                                                                                                                                                                |
| Probability of condom use for general public                                 | %             | 12.5%      | 13.0%       | 55.7%       | Rwanda DHS <sup>1</sup>                                                      | Calibrated to present time incidence assuming over-reporting of condom use; % reporting yes to using condom during last sexual intercourse in the past 12 months: Women: 48.4% (95% CI: 41.3 - 55.7%) and men: 28.0% (95% CI: 25.3 - 30.8%) |
| Probability of having vaginal sex                                            | %             | 91.4%      | 90.1%       | 92.6%       | BBSS SW Rwanda 2016 <sup>5</sup>                                             | Survey data, assumed complement of probability of anal sex                                                                                                                                                                                  |
| Probability of having anal sex                                               | %             | 8.6%       | 7.4%        | 9.9%        | BBSS SW Rwanda 2016 <sup>5</sup>                                             | Survey data (95% CI: 7.4% - 9.9%)                                                                                                                                                                                                           |
| Probability of HIV infection through receptive vaginal sex (unprotected)     | % per act     | 0.82%      | 0.39%       | 1.5%        | Wawer 2005 <sup>13</sup>                                                     | 0.82/coital act (95% CI: 0.39%-1.5%)                                                                                                                                                                                                        |
| Probability of HIV infection through receptive anal sex,                     | % per act     | 1.40%      | 0.48%       | 2.85%       | Jin 2010 <sup>14</sup>                                                       | 95% CI: 0.48 - 2.85%                                                                                                                                                                                                                        |

| Parameter                                                                                          | Estimate type | Base value | Lower bound | Upper bound | Source                      | Comments             |
|----------------------------------------------------------------------------------------------------|---------------|------------|-------------|-------------|-----------------------------|----------------------|
| while not on ART (unprotected)                                                                     |               |            |             |             |                             |                      |
| Probability of HIV infection through <i>insertive vaginal sex</i> , while not on ART (unprotected) | % per act     | 0.040%     | 0.080%      | 2.0%        | Baggaley 2010 <sup>15</sup> | 95% CI: 0.08 - 2.0%  |
| Probability of HIV infection through <i>insertive anal sex</i> , while not on ART (unprotected)    | % per act     | 0.34%      | 0.060%      | 0.62%       | Jin 2010 <sup>14</sup>      | 95% CI: 0.06 - 0.62% |

The base values used for the 2017-2027 model run were the output values for the 2010-2017 validation period.

**Supplementary Table 3. Probability transition matrix for the HIV transmission Markov model**

|                                     | 1. HIV-           | 2. HIV+ undiagnosed | 3. HIV+ diagnosed pre-ART | 4. HIV+ ART suppressed VL | 5. HIV+ ART non-suppressed VL  | 6. Death |
|-------------------------------------|-------------------|---------------------|---------------------------|---------------------------|--------------------------------|----------|
| State 1. HIV-                       | $[1-(1)]x[1-(2)]$ | $[1-(1)]x(2)$       |                           |                           |                                | (1)      |
| State 2. HIV+ undiagnosed           |                   | $[1-(3)]x[1-(4)]$   | $[1-(3)]x(4)$             |                           |                                | (3)      |
| State 3. HIV+ diagnosed pre-ART     |                   |                     | $[1-(5)]x[1-(6)]$         | $[1-(5)]x(6)$             |                                | (5)      |
| State 4. HIV+ ART suppressed VL     |                   |                     |                           | $[1-(7)]x(8)x[1-(9)]$     | $[1-(7)]x[1-(8)+(8)x(9)]$      | (7)      |
| State 5. HIV+ ART non-suppressed VL |                   |                     |                           | $[1-(10)]x(11)x[1-(12)]$  | $[1-(10)]x[1-(11)x\{1-(12)\}]$ | (10)     |
| State 6. Death                      |                   |                     |                           |                           |                                | 1        |

State 1: (1) GP mortality rate; (2) = Incidence;

State 2: (3) = HIV+ undiagnosed mortality rate; (4) = Testing rate;

State 3: (5) = Mortality rate pre-ART; (6) = % choosing to start ART

State 4: (7) = Mortality rate of ART suppressed with suppressed viral load; (8) = % adhering to ART; (9) = ART failure rate

State 5: (10) = Mortality rate for ART patients with non-suppressed viral load; (11) = % starting alternative ART



**Supplementary Table 4. Different scenario analyses of ART, condom, and PrEP, and changes in the number of FSWs on HIV prevalence**

| Description                                                 | Input     |            |           | Output: Prevalence (%) at Year 2027 |            |           |             |            |           |                    |            |           |
|-------------------------------------------------------------|-----------|------------|-----------|-------------------------------------|------------|-----------|-------------|------------|-----------|--------------------|------------|-----------|
|                                                             | Base case | Worst case | Best case | Female sex workers (FSWs)           |            |           | Sex clients |            |           | General population |            |           |
|                                                             |           |            |           | Base case                           | Worst case | Best case | Base case   | Worst case | Best case | Base case          | Worst case | Best case |
| <b>Scenario 1: Changes in testing and treatment for ART</b> |           |            |           |                                     |            |           |             |            |           |                    |            |           |
| A) Probability of HIV test for FSW                          | 0.71      | 0.50       | 0.90      | 37.37                               | 37.36      | 37.38     | 17.87       | 18         | 17.8      | 2.32               | 2.32       | 2.32      |
| B) Probability of HIV test for general population           | 0.46      | 0.30       | 0.80      | 37.37                               | 37.75      | 36.92     | 17.87       | 17.84      | 17.91     | 2.32               | 2.32       | 2.31      |
| C) % of national coverage of ART                            | 0.80      | 0.60       | 0.90      | 37.37                               | 37.59      | 37.28     | 17.87       | 17.97      | 17.84     | 2.32               | 2.32       | 2.32      |
| D) % of consistent adherence to ART                         | 0.90      | 0.74       | 0.95      | 37.37                               | 38.42      | 36.99     | 17.87       | 18.86      | 17.5      | 2.32               | 2.35       | 2.3       |
| E) Parameters above combined                                | --        | --         | --        | 37.37                               | 38.94      | 36.4      | 17.87       | 19.02      | 17.42     | 2.32               | 2.36       | 2.29      |
| <b>Scenario 2: Changes in condom and PrEP use</b>           |           |            |           |                                     |            |           |             |            |           |                    |            |           |
| A) % of consistent condom use for FSWs*                     | 0.45-0.55 | 0.30-0.40  | 0.75-0.85 | 37.37                               | 41.96      | 29.51     | 17.87       | 21.27      | 11.9      | 2.32               | 2.32       | 2.3       |
| B) % of consistent condom use for General population        | 0.30      | 0.2        | 0.45      | 37.37                               | 37.4       | 37.32     | 17.87       | 17.91      | 17.85     | 2.32               | 2.44       | 2.15      |
| C) % of consistent PrEP use for FSWs*                       | 0.25-0.65 | 0.05-0.40  | 0.35-0.75 | 37.37                               | 38.64      | 36.09     | 17.87       | 17.99      | 17.76     | 2.32               | 2.32       | 2.32      |
| D) Parameters above combined                                | --        | --         | --        | 37.37                               | 43.74      | 29.07     | 17.87       | 21.49      | 11.85     | 2.32               | 2.45       | 2.13      |
| <b>Scenario 3: Changes in number of FSWs</b>                |           |            |           |                                     |            |           |             |            |           |                    |            |           |
| A) Probability of women entering as a sex worker            | 0.0004    | 0.0008**   | 0.0002*** | 37.37                               | 24.45      | 46.63     | 17.87       | 16.19      | 18.95     | 2.32               | 2.31       | 2.32      |
| <b>Combined scenarios</b>                                   |           |            |           |                                     |            |           |             |            |           |                    |            |           |
| A) Scenarios 1 and 2 combined                               | --        | --         | --        | 37.37                               | 46.52      | 28.99     | 17.87       | 23.31      | 11.81     | 2.32               | 2.52       | 2.12      |
| B) Scenarios 1, 2, and 3 combined                           | --        | --         | --        | 37.37                               | 30.72      | 36.45     | 17.87       | 20.6       | 12.18     | 2.32               | 2.51       | 2.12      |

The probabilities of sex workers and clients disengaging from paid sex (i.e., transitioning back to the general population) are provided in the supplementary table 2

Prevalence (%) at year 2017: FSW = 45.4%; MP = 15.3%; Overall population = 2.9%

\* Intervals represent starting point (2017) and end point (2027) assuming a linear increase over 10 years

\*\*2x times more young girls choosing to enter sex work assumed as the worse case

\*\*\*50% fewer young girls choosing to enter sex work assumed as the best case.

**Supplementary Table 5. Different scenario analyses of ART, condom, and PrEP, and changes in the number of FSWs on HIV incidence**

| Description                                                 | Input     |            |           | Output: Incidence (Cases/1000 person-years) at Year 2027 |            |           |             |            |           |                    |            |           |
|-------------------------------------------------------------|-----------|------------|-----------|----------------------------------------------------------|------------|-----------|-------------|------------|-----------|--------------------|------------|-----------|
|                                                             | Base case | Worst case | Best case | Female sex workers (FSWs)                                |            |           | Sex clients |            |           | General population |            |           |
|                                                             |           |            |           | Base case                                                | Worst case | Best case | Base case   | Worst case | Best case | Base case          | Worst case | Best case |
| <b>Scenario 1: Changes in testing and treatment for ART</b> |           |            |           |                                                          |            |           |             |            |           |                    |            |           |
| A) Probability of HIV test for FSW                          | 0.71      | 0.50       | 0.90      | 15.84                                                    | 15.95      | 15.75     | 12.45       | 12.57      | 12.36     | 0.88               | 0.88       | 0.88      |
| B) Probability of HIV test for general population           | 0.46      | 0.30       | 0.80      | 15.84                                                    | 16.38      | 15.36     | 12.45       | 12.56      | 12.3      | 0.88               | 0.91       | 0.86      |
| C) % of national coverage of ART                            | 0.80      | 0.60       | 0.90      | 15.84                                                    | 16.17      | 15.71     | 12.45       | 12.61      | 12.38     | 0.88               | 0.89       | 0.88      |
| D) % of consistent adherence to ART                         | 0.90      | 0.74       | 0.95      | 15.84                                                    | 19.02      | 14.64     | 12.45       | 14.63      | 11.59     | 0.88               | 1.02       | 0.83      |
| E) Parameters above combined                                | --        | --         | --        | 15.84                                                    | 19.89      | 13.95     | 12.45       | 15.02      | 11.29     | 0.88               | 1.05       | 0.8       |
| <b>Scenario 2: Changes in condom and PrEP use</b>           |           |            |           |                                                          |            |           |             |            |           |                    |            |           |
| A) % of consistent condom use for FSWs*                     | 0.45-0.55 | 0.30-0.40  | 0.75-0.85 | 15.84                                                    | 24.99      | 3.59      | 12.45       | 18.45      | 3.39      | 0.88               | 0.89       | 0.88      |
| B) % of consistent condom use for General population        | 0.30      | 0.2        | 0.45      | 15.84                                                    | 15.86      | 15.8      | 12.45       | 12.45      | 12.43     | 0.88               | 1.06       | 0.64      |
| C) % of consistent PrEP use for FSWs*                       | 0.25-0.65 | 0.05-0.45  | 0.35-0.75 | 15.84                                                    | 20.23      | 11.49     | 12.45       | 12.86      | 12.03     | 0.88               | 0.88       | 0.88      |
| D) Parameters above combined                                | --        | --         | --        | 15.84                                                    | 32.01      | 2.61      | 12.45       | 19.22      | 3.34      | 0.88               | 1.07       | 0.64      |
| <b>Scenario 3: Changes in number of FSWs</b>                |           |            |           |                                                          |            |           |             |            |           |                    |            |           |
| A) Probability of women entering as a sex worker            | 0.0004    | 0.0008**   | 0.0002*** | 15.84                                                    | 8.94       | 21.47     | 12.45       | 8.24       | 15.42     | 0.88               | 0.88       | 0.88      |
| <b>Combined scenarios</b>                                   |           |            |           |                                                          |            |           |             |            |           |                    |            |           |
| A) Scenarios 1 and 2 combined                               | --        | --         | --        | 15.84                                                    | 41.1       | 2.4       | 12.45       | 23.72      | 3.12      | 0.88               | 1.28       | 0.59      |
| B) Scenarios 1, 2, and 3 combined                           | --        | --         | --        | 15.84                                                    | 22.68      | 3.15      | 12.45       | 15.9       | 3.91      | 0.88               | 1.28       | 0.59      |

The probabilities of sex workers and clients disengaging from paid sex (i.e., transitioning back to the general population) are provided in the supplementary table 2

Incidence (cases/1000 PY) at year 2017: FSW = 43.5.; MP = 18.2; Overall population = 1.4

\* Intervals represent starting point (2017) and end point (2027) assuming a linear increase over 10 years

\*\*2x times more young girls choosing to enter sex work assumed as the worse case

\*\*\*1/2 times less young girls choosing to enter sex work assumed as the best case

**Supplementary Table 6. Overall number of people living with HIV in Rwanda from 2017 to 2027, with and without PrEP**

| Time       | Overall number of people living with HIV, without PrEP |         |             | Overall number of people living with HIV, with PrEP |         |             |
|------------|--------------------------------------------------------|---------|-------------|-----------------------------------------------------|---------|-------------|
|            | Lower limit                                            | Median  | Upper limit | Lower limit                                         | Median  | Upper limit |
| 2017-01-01 | 344,769                                                | 344,971 | 345,183     | 344,757                                             | 344,971 | 345,182     |
| 2017-04-01 | 346,118                                                | 346,360 | 346,616     | 346,078                                             | 346,350 | 346,629     |
| 2017-07-01 | 347,466                                                | 347,742 | 348,072     | 347,438                                             | 347,743 | 348,035     |
| 2017-10-01 | 348,793                                                | 349,137 | 349,495     | 348,797                                             | 349,123 | 349,463     |
| 2018-01-01 | 350,148                                                | 350,527 | 350,908     | 350,154                                             | 350,514 | 350,888     |
| 2018-04-01 | 351,502                                                | 351,913 | 352,354     | 351,517                                             | 351,912 | 352,318     |
| 2018-07-01 | 352,876                                                | 353,306 | 353,748     | 352,867                                             | 353,300 | 353,746     |
| 2018-10-01 | 354,253                                                | 354,701 | 355,190     | 354,155                                             | 354,617 | 355,071     |
| 2019-01-01 | 355,614                                                | 356,097 | 356,590     | 355,447                                             | 355,920 | 356,399     |
| 2019-04-01 | 356,991                                                | 357,494 | 358,008     | 356,710                                             | 357,215 | 357,728     |
| 2019-07-01 | 358,351                                                | 358,887 | 359,450     | 358,020                                             | 358,510 | 359,062     |
| 2019-10-01 | 359,749                                                | 360,293 | 360,861     | 359,296                                             | 359,805 | 360,399     |
| 2020-01-01 | 361,108                                                | 361,691 | 362,263     | 360,557                                             | 361,094 | 361,694     |
| 2020-04-01 | 362,496                                                | 363,099 | 363,684     | 361,802                                             | 362,367 | 362,986     |
| 2020-07-01 | 363,887                                                | 364,496 | 365,094     | 363,069                                             | 363,658 | 364,303     |
| 2020-10-01 | 365,271                                                | 365,898 | 366,543     | 364,309                                             | 364,932 | 365,570     |
| 2021-01-01 | 366,701                                                | 367,316 | 367,955     | 365,562                                             | 366,212 | 366,866     |
| 2021-04-01 | 368,055                                                | 368,717 | 369,385     | 366,837                                             | 367,473 | 368,139     |
| 2021-07-01 | 369,434                                                | 370,123 | 370,793     | 368,079                                             | 368,732 | 369,410     |
| 2021-10-01 | 370,839                                                | 371,538 | 372,237     | 369,302                                             | 369,996 | 370,672     |
| 2022-01-01 | 372,235                                                | 372,954 | 373,679     | 370,540                                             | 371,261 | 371,969     |
| 2022-04-01 | 373,616                                                | 374,371 | 375,110     | 371,774                                             | 372,510 | 373,256     |
| 2022-07-01 | 375,023                                                | 375,780 | 376,494     | 372,994                                             | 373,755 | 374,525     |
| 2022-10-01 | 376,438                                                | 377,193 | 377,978     | 374,246                                             | 375,003 | 375,773     |
| 2023-01-01 | 377,829                                                | 378,626 | 379,410     | 375,469                                             | 376,248 | 377,007     |
| 2023-04-01 | 379,254                                                | 380,043 | 380,824     | 376,695                                             | 377,493 | 378,304     |
| 2023-07-01 | 380,648                                                | 381,465 | 382,240     | 377,876                                             | 378,707 | 379,539     |
| 2023-10-01 | 382,063                                                | 382,900 | 383,669     | 379,102                                             | 379,940 | 380,783     |
| 2024-01-01 | 383,466                                                | 384,317 | 385,105     | 380,359                                             | 381,169 | 382,024     |
| 2024-04-01 | 384,865                                                | 385,735 | 386,572     | 381,560                                             | 382,374 | 383,271     |
| 2024-07-01 | 386,290                                                | 387,164 | 388,007     | 382,742                                             | 383,583 | 384,501     |
| 2024-10-01 | 387,688                                                | 388,589 | 389,499     | 383,968                                             | 384,770 | 385,706     |
| 2025-01-01 | 389,109                                                | 390,014 | 390,964     | 385,147                                             | 385,978 | 386,915     |
| 2025-04-01 | 390,531                                                | 391,436 | 392,412     | 386,348                                             | 387,186 | 388,153     |
| 2025-07-01 | 391,940                                                | 392,867 | 393,813     | 387,484                                             | 388,395 | 389,373     |
| 2025-10-01 | 393,365                                                | 394,293 | 395,223     | 388,657                                             | 389,587 | 390,560     |
| 2026-01-01 | 394,741                                                | 395,714 | 396,680     | 389,807                                             | 390,772 | 391,764     |
| 2026-04-01 | 396,167                                                | 397,144 | 398,123     | 390,971                                             | 391,946 | 392,925     |
| 2026-07-01 | 397,584                                                | 398,570 | 399,574     | 392,141                                             | 393,125 | 394,107     |
| 2026-10-01 | 399,000                                                | 400,013 | 401,022     | 393,333                                             | 394,306 | 395,289     |

| Time       | Overall number of people living with HIV, without PrEP |         |             | Overall number of people living with HIV, with PrEP |         |             |
|------------|--------------------------------------------------------|---------|-------------|-----------------------------------------------------|---------|-------------|
|            | Lower limit                                            | Median  | Upper limit | Lower limit                                         | Median  | Upper limit |
| 2027-01-01 | 400,438                                                | 401,443 | 402,451     | 394,491                                             | 395,453 | 396,487     |



**Supplementary Table 7. Overall incidence of HIV in Rwanda from 2017 to 2027, with and without PrEP (per 100 years)**

| Time       | Overall HIV incidence (per 1000 person-years) without PrEP |        |             | Overall HIV incidence (per 1000 person-years) with PrEP |        |             |
|------------|------------------------------------------------------------|--------|-------------|---------------------------------------------------------|--------|-------------|
|            | Lower limit                                                | Median | Upper limit | Lower limit                                             | Median | Upper limit |
| 2017-01-01 | 1.358                                                      | 1.360  | 1.362       | 1.358                                                   | 1.360  | 1.362       |
| 2017-04-01 | 1.353                                                      | 1.356  | 1.358       | 1.353                                                   | 1.356  | 1.358       |
| 2017-07-01 | 1.349                                                      | 1.352  | 1.355       | 1.349                                                   | 1.352  | 1.355       |
| 2017-10-01 | 1.345                                                      | 1.349  | 1.352       | 1.345                                                   | 1.348  | 1.352       |
| 2018-01-01 | 1.342                                                      | 1.345  | 1.349       | 1.342                                                   | 1.345  | 1.348       |
| 2018-04-01 | 1.338                                                      | 1.342  | 1.346       | 1.338                                                   | 1.342  | 1.346       |
| 2018-07-01 | 1.335                                                      | 1.339  | 1.342       | 1.335                                                   | 1.339  | 1.342       |
| 2018-10-01 | 1.331                                                      | 1.335  | 1.339       | 1.282                                                   | 1.286  | 1.290       |
| 2019-01-01 | 1.328                                                      | 1.332  | 1.336       | 1.276                                                   | 1.280  | 1.283       |
| 2019-04-01 | 1.325                                                      | 1.329  | 1.333       | 1.269                                                   | 1.273  | 1.276       |
| 2019-07-01 | 1.322                                                      | 1.325  | 1.330       | 1.262                                                   | 1.266  | 1.270       |
| 2019-10-01 | 1.318                                                      | 1.322  | 1.326       | 1.255                                                   | 1.259  | 1.263       |
| 2020-01-01 | 1.314                                                      | 1.318  | 1.323       | 1.248                                                   | 1.252  | 1.256       |
| 2020-04-01 | 1.311                                                      | 1.315  | 1.319       | 1.242                                                   | 1.246  | 1.250       |
| 2020-07-01 | 1.307                                                      | 1.311  | 1.315       | 1.235                                                   | 1.239  | 1.243       |
| 2020-10-01 | 1.303                                                      | 1.307  | 1.312       | 1.228                                                   | 1.232  | 1.236       |
| 2021-01-01 | 1.300                                                      | 1.304  | 1.308       | 1.222                                                   | 1.226  | 1.230       |
| 2021-04-01 | 1.296                                                      | 1.300  | 1.304       | 1.215                                                   | 1.219  | 1.223       |
| 2021-07-01 | 1.292                                                      | 1.296  | 1.300       | 1.208                                                   | 1.212  | 1.216       |
| 2021-10-01 | 1.288                                                      | 1.292  | 1.296       | 1.201                                                   | 1.206  | 1.210       |
| 2022-01-01 | 1.284                                                      | 1.288  | 1.292       | 1.195                                                   | 1.199  | 1.203       |
| 2022-04-01 | 1.280                                                      | 1.284  | 1.288       | 1.188                                                   | 1.192  | 1.196       |
| 2022-07-01 | 1.276                                                      | 1.280  | 1.284       | 1.181                                                   | 1.185  | 1.189       |
| 2022-10-01 | 1.272                                                      | 1.276  | 1.280       | 1.174                                                   | 1.178  | 1.182       |
| 2023-01-01 | 1.268                                                      | 1.272  | 1.276       | 1.168                                                   | 1.171  | 1.175       |
| 2023-04-01 | 1.264                                                      | 1.268  | 1.272       | 1.161                                                   | 1.164  | 1.168       |
| 2023-07-01 | 1.259                                                      | 1.263  | 1.268       | 1.154                                                   | 1.158  | 1.161       |
| 2023-10-01 | 1.255                                                      | 1.259  | 1.263       | 1.147                                                   | 1.151  | 1.154       |
| 2024-01-01 | 1.251                                                      | 1.255  | 1.259       | 1.140                                                   | 1.144  | 1.147       |
| 2024-04-01 | 1.246                                                      | 1.251  | 1.255       | 1.133                                                   | 1.137  | 1.141       |
| 2024-07-01 | 1.242                                                      | 1.246  | 1.251       | 1.127                                                   | 1.130  | 1.134       |
| 2024-10-01 | 1.238                                                      | 1.242  | 1.246       | 1.120                                                   | 1.123  | 1.127       |
| 2025-01-01 | 1.233                                                      | 1.238  | 1.242       | 1.113                                                   | 1.116  | 1.120       |
| 2025-04-01 | 1.229                                                      | 1.233  | 1.238       | 1.106                                                   | 1.109  | 1.113       |
| 2025-07-01 | 1.225                                                      | 1.229  | 1.233       | 1.099                                                   | 1.103  | 1.106       |
| 2025-10-01 | 1.220                                                      | 1.224  | 1.229       | 1.092                                                   | 1.096  | 1.100       |
| 2026-01-01 | 1.215                                                      | 1.220  | 1.224       | 1.085                                                   | 1.089  | 1.093       |
| 2026-04-01 | 1.211                                                      | 1.216  | 1.220       | 1.079                                                   | 1.082  | 1.086       |
| 2026-07-01 | 1.207                                                      | 1.211  | 1.216       | 1.072                                                   | 1.076  | 1.079       |
| 2026-10-01 | 1.202                                                      | 1.207  | 1.211       | 1.065                                                   | 1.069  | 1.073       |

| Time       | Overall HIV incidence (per 1000 person-years) without PrEP |        |             | Overall HIV incidence (per 1000 person-years) with PrEP |        |             |
|------------|------------------------------------------------------------|--------|-------------|---------------------------------------------------------|--------|-------------|
|            | Lower limit                                                | Median | Upper limit | Lower limit                                             | Median | Upper limit |
| 2027-01-01 | 1.198                                                      | 1.202  | 1.206       | 1.058                                                   | 1.062  | 1.066       |

**Supplementary Table 8. Number of FSWs and sex clients living with HIV in Rwanda from 2017 to 2027, with and without PrEP**

| Time       | Population group   | Number of people living with HIV, without PrEP |        |             | Number of people living with HIV, with PrEP |        |             |
|------------|--------------------|------------------------------------------------|--------|-------------|---------------------------------------------|--------|-------------|
|            |                    | Lower limit                                    | Median | Upper limit | Lower limit                                 | Median | Upper limit |
| 2017-01-01 | Female sex workers | 21,764                                         | 21,824 | 21,887      | 21,763                                      | 21,823 | 21,884      |
| 2017-04-01 | Female sex workers | 21,772                                         | 21,847 | 21,922      | 21,765                                      | 21,846 | 21,919      |
| 2017-07-01 | Female sex workers | 21,783                                         | 21,869 | 21,957      | 21,783                                      | 21,869 | 21,952      |
| 2017-10-01 | Female sex workers | 21,805                                         | 21,895 | 21,994      | 21,792                                      | 21,898 | 21,989      |
| 2018-01-01 | Female sex workers | 21,830                                         | 21,925 | 22,028      | 21,818                                      | 21,926 | 22,026      |
| 2018-04-01 | Female sex workers | 21,852                                         | 21,957 | 22,066      | 21,841                                      | 21,958 | 22,065      |
| 2018-07-01 | Female sex workers | 21,879                                         | 21,991 | 22,107      | 21,875                                      | 21,993 | 22,103      |
| 2018-10-01 | Female sex workers | 21,911                                         | 22,027 | 22,149      | 21,827                                      | 21,945 | 22,064      |
| 2019-01-01 | Female sex workers | 21,941                                         | 22,066 | 22,191      | 21,777                                      | 21,897 | 22,023      |
| 2019-04-01 | Female sex workers | 21,969                                         | 22,108 | 22,238      | 21,723                                      | 21,851 | 21,978      |
| 2019-07-01 | Female sex workers | 22,010                                         | 22,144 | 22,290      | 21,673                                      | 21,802 | 21,933      |
| 2019-10-01 | Female sex workers | 22,046                                         | 22,189 | 22,336      | 21,618                                      | 21,751 | 21,892      |
| 2020-01-01 | Female sex workers | 22,082                                         | 22,233 | 22,379      | 21,559                                      | 21,702 | 21,844      |
| 2020-04-01 | Female sex workers | 22,125                                         | 22,279 | 22,427      | 21,508                                      | 21,651 | 21,795      |
| 2020-07-01 | Female sex workers | 22,171                                         | 22,323 | 22,480      | 21,448                                      | 21,599 | 21,745      |
| 2020-10-01 | Female sex workers | 22,218                                         | 22,369 | 22,533      | 21,383                                      | 21,550 | 21,689      |
| 2021-01-01 | Female sex workers | 22,256                                         | 22,416 | 22,596      | 21,336                                      | 21,493 | 21,634      |
| 2021-04-01 | Female sex workers | 22,303                                         | 22,464 | 22,633      | 21,264                                      | 21,433 | 21,587      |
| 2021-07-01 | Female sex workers | 22,354                                         | 22,514 | 22,684      | 21,201                                      | 21,373 | 21,527      |
| 2021-10-01 | Female sex workers | 22,404                                         | 22,564 | 22,736      | 21,148                                      | 21,314 | 21,471      |
| 2022-01-01 | Female sex workers | 22,452                                         | 22,615 | 22,795      | 21,076                                      | 21,252 | 21,410      |
| 2022-04-01 | Female sex workers | 22,502                                         | 22,668 | 22,848      | 21,007                                      | 21,189 | 21,352      |
| 2022-07-01 | Female sex workers | 22,560                                         | 22,721 | 22,914      | 20,945                                      | 21,120 | 21,281      |
| 2022-10-01 | Female sex workers | 22,604                                         | 22,774 | 22,958      | 20,866                                      | 21,052 | 21,218      |
| 2023-01-01 | Female sex workers | 22,653                                         | 22,828 | 23,011      | 20,792                                      | 20,976 | 21,146      |
| 2023-04-01 | Female sex workers | 22,703                                         | 22,879 | 23,064      | 20,719                                      | 20,904 | 21,075      |
| 2023-07-01 | Female sex workers | 22,747                                         | 22,934 | 23,122      | 20,642                                      | 20,827 | 21,001      |
| 2023-10-01 | Female sex workers | 22,809                                         | 22,985 | 23,188      | 20,560                                      | 20,751 | 20,917      |
| 2024-01-01 | Female sex workers | 22,857                                         | 23,040 | 23,235      | 20,481                                      | 20,666 | 20,845      |
| 2024-04-01 | Female sex workers | 22,901                                         | 23,092 | 23,293      | 20,396                                      | 20,584 | 20,758      |
| 2024-07-01 | Female sex workers | 22,952                                         | 23,146 | 23,353      | 20,309                                      | 20,498 | 20,680      |
| 2024-10-01 | Female sex workers | 23,001                                         | 23,197 | 23,408      | 20,227                                      | 20,409 | 20,590      |
| 2025-01-01 | Female sex workers | 23,049                                         | 23,251 | 23,455      | 20,137                                      | 20,322 | 20,505      |
| 2025-04-01 | Female sex workers | 23,094                                         | 23,302 | 23,507      | 20,046                                      | 20,230 | 20,411      |
| 2025-07-01 | Female sex workers | 23,143                                         | 23,353 | 23,560      | 19,950                                      | 20,133 | 20,319      |
| 2025-10-01 | Female sex workers | 23,185                                         | 23,400 | 23,614      | 19,851                                      | 20,035 | 20,230      |
| 2026-01-01 | Female sex workers | 23,233                                         | 23,453 | 23,665      | 19,749                                      | 19,934 | 20,130      |
| 2026-04-01 | Female sex workers | 23,282                                         | 23,502 | 23,713      | 19,649                                      | 19,831 | 20,026      |
| 2026-07-01 | Female sex workers | 23,324                                         | 23,549 | 23,766      | 19,540                                      | 19,724 | 19,920      |
| 2026-10-01 | Female sex workers | 23,365                                         | 23,599 | 23,811      | 19,428                                      | 19,620 | 19,815      |
| 2027-01-01 | Female sex workers | 23,419                                         | 23,646 | 23,861      | 19,318                                      | 19,512 | 19,702      |
| 2017-01-01 | Sex clients        | 23,458                                         | 23,544 | 23,633      | 23,456                                      | 23,541 | 23,628      |
| 2017-04-01 | Sex clients        | 23,796                                         | 23,903 | 24,008      | 23,793                                      | 23,898 | 24,000      |

| Time       | Population group | Number of people living with HIV, without PrEP |        |             | Number of people living with HIV, with PrEP |        |             |
|------------|------------------|------------------------------------------------|--------|-------------|---------------------------------------------|--------|-------------|
|            |                  | Lower limit                                    | Median | Upper limit | Lower limit                                 | Median | Upper limit |
| 2017-07-01 | Sex clients      | 24,136                                         | 24,252 | 24,373      | 24,126                                      | 24,247 | 24,359      |
| 2017-10-01 | Sex clients      | 24,460                                         | 24,595 | 24,729      | 24,460                                      | 24,589 | 24,713      |
| 2018-01-01 | Sex clients      | 24,785                                         | 24,925 | 25,076      | 24,791                                      | 24,924 | 25,066      |
| 2018-04-01 | Sex clients      | 25,103                                         | 25,258 | 25,421      | 25,108                                      | 25,254 | 25,406      |
| 2018-07-01 | Sex clients      | 25,418                                         | 25,579 | 25,749      | 25,421                                      | 25,574 | 25,729      |
| 2018-10-01 | Sex clients      | 25,726                                         | 25,895 | 26,060      | 25,717                                      | 25,892 | 26,055      |
| 2019-01-01 | Sex clients      | 26,022                                         | 26,202 | 26,388      | 26,009                                      | 26,193 | 26,366      |
| 2019-04-01 | Sex clients      | 26,321                                         | 26,505 | 26,691      | 26,296                                      | 26,488 | 26,678      |
| 2019-07-01 | Sex clients      | 26,607                                         | 26,800 | 26,988      | 26,583                                      | 26,775 | 26,971      |
| 2019-10-01 | Sex clients      | 26,902                                         | 27,094 | 27,289      | 26,848                                      | 27,055 | 27,260      |
| 2020-01-01 | Sex clients      | 27,177                                         | 27,379 | 27,574      | 27,112                                      | 27,322 | 27,541      |
| 2020-04-01 | Sex clients      | 27,447                                         | 27,659 | 27,859      | 27,380                                      | 27,583 | 27,798      |
| 2020-07-01 | Sex clients      | 27,716                                         | 27,936 | 28,144      | 27,612                                      | 27,840 | 28,056      |
| 2020-10-01 | Sex clients      | 27,980                                         | 28,207 | 28,419      | 27,860                                      | 28,092 | 28,312      |
| 2021-01-01 | Sex clients      | 28,237                                         | 28,468 | 28,701      | 28,083                                      | 28,322 | 28,562      |
| 2021-04-01 | Sex clients      | 28,484                                         | 28,731 | 28,967      | 28,311                                      | 28,552 | 28,791      |
| 2021-07-01 | Sex clients      | 28,738                                         | 28,983 | 29,235      | 28,529                                      | 28,777 | 29,021      |
| 2021-10-01 | Sex clients      | 28,982                                         | 29,233 | 29,475      | 28,739                                      | 29,000 | 29,241      |
| 2022-01-01 | Sex clients      | 29,225                                         | 29,477 | 29,715      | 28,955                                      | 29,213 | 29,465      |
| 2022-04-01 | Sex clients      | 29,469                                         | 29,713 | 29,952      | 29,164                                      | 29,414 | 29,666      |
| 2022-07-01 | Sex clients      | 29,693                                         | 29,946 | 30,195      | 29,362                                      | 29,613 | 29,859      |
| 2022-10-01 | Sex clients      | 29,916                                         | 30,175 | 30,429      | 29,540                                      | 29,804 | 30,064      |
| 2023-01-01 | Sex clients      | 30,139                                         | 30,399 | 30,644      | 29,731                                      | 29,992 | 30,247      |
| 2023-04-01 | Sex clients      | 30,354                                         | 30,619 | 30,882      | 29,903                                      | 30,167 | 30,435      |
| 2023-07-01 | Sex clients      | 30,563                                         | 30,837 | 31,096      | 30,072                                      | 30,340 | 30,620      |
| 2023-10-01 | Sex clients      | 30,760                                         | 31,046 | 31,310      | 30,236                                      | 30,510 | 30,781      |
| 2024-01-01 | Sex clients      | 30,961                                         | 31,258 | 31,526      | 30,400                                      | 30,666 | 30,952      |
| 2024-04-01 | Sex clients      | 31,157                                         | 31,460 | 31,725      | 30,536                                      | 30,819 | 31,115      |
| 2024-07-01 | Sex clients      | 31,359                                         | 31,659 | 31,935      | 30,684                                      | 30,968 | 31,262      |
| 2024-10-01 | Sex clients      | 31,552                                         | 31,856 | 32,133      | 30,813                                      | 31,108 | 31,398      |
| 2025-01-01 | Sex clients      | 31,741                                         | 32,050 | 32,325      | 30,955                                      | 31,242 | 31,528      |
| 2025-04-01 | Sex clients      | 31,933                                         | 32,237 | 32,515      | 31,082                                      | 31,371 | 31,659      |
| 2025-07-01 | Sex clients      | 32,100                                         | 32,418 | 32,706      | 31,192                                      | 31,492 | 31,796      |
| 2025-10-01 | Sex clients      | 32,281                                         | 32,597 | 32,874      | 31,303                                      | 31,608 | 31,917      |
| 2026-01-01 | Sex clients      | 32,439                                         | 32,772 | 33,059      | 31,407                                      | 31,721 | 32,031      |
| 2026-04-01 | Sex clients      | 32,607                                         | 32,943 | 33,227      | 31,505                                      | 31,826 | 32,117      |
| 2026-07-01 | Sex clients      | 32,789                                         | 33,112 | 33,400      | 31,608                                      | 31,925 | 32,225      |
| 2026-10-01 | Sex clients      | 32,946                                         | 33,272 | 33,560      | 31,690                                      | 32,017 | 32,337      |
| 2027-01-01 | Sex clients      | 33,108                                         | 33,439 | 33,729      | 31,774                                      | 32,107 | 32,430      |

**Supplementary Table 9. Incidence of HIV among FSWs and sex clients in Rwanda from 2017 to 2027, with and without PrEP (per 1000 person-years)**

| Time       | Population group   | HIV incidence (per 1000 person-years) without PrEP |        |             | HIV incidence (per 1000 person-years) with PrEP |        |             |
|------------|--------------------|----------------------------------------------------|--------|-------------|-------------------------------------------------|--------|-------------|
|            |                    | Lower limit                                        | Median | Upper limit | Lower limit                                     | Median | Upper limit |
| 2017-01-01 | Female sex workers | 42.38                                              | 42.60  | 42.82       | 42.38                                           | 42.59  | 42.83       |
| 2017-04-01 | Female sex workers | 42.53                                              | 42.84  | 43.16       | 42.55                                           | 42.83  | 43.13       |
| 2017-07-01 | Female sex workers | 42.74                                              | 43.10  | 43.42       | 42.76                                           | 43.09  | 43.46       |
| 2017-10-01 | Female sex workers | 42.98                                              | 43.35  | 43.71       | 42.95                                           | 43.34  | 43.72       |
| 2018-01-01 | Female sex workers | 43.18                                              | 43.60  | 44.02       | 43.18                                           | 43.58  | 44.01       |
| 2018-04-01 | Female sex workers | 43.40                                              | 43.84  | 44.27       | 43.42                                           | 43.83  | 44.30       |
| 2018-07-01 | Female sex workers | 43.60                                              | 44.07  | 44.54       | 43.65                                           | 44.05  | 44.52       |
| 2018-10-01 | Female sex workers | 43.81                                              | 44.29  | 44.78       | 31.82                                           | 32.13  | 32.48       |
| 2019-01-01 | Female sex workers | 44.02                                              | 44.50  | 44.96       | 31.44                                           | 31.76  | 32.12       |
| 2019-04-01 | Female sex workers | 44.21                                              | 44.69  | 45.14       | 31.08                                           | 31.38  | 31.74       |
| 2019-07-01 | Female sex workers | 44.40                                              | 44.87  | 45.35       | 30.66                                           | 30.99  | 31.32       |
| 2019-10-01 | Female sex workers | 44.57                                              | 45.02  | 45.51       | 30.25                                           | 30.57  | 30.91       |
| 2020-01-01 | Female sex workers | 44.68                                              | 45.18  | 45.65       | 29.80                                           | 30.13  | 30.46       |
| 2020-04-01 | Female sex workers | 44.83                                              | 45.33  | 45.82       | 29.35                                           | 29.67  | 30.00       |
| 2020-07-01 | Female sex workers | 44.96                                              | 45.46  | 45.94       | 28.88                                           | 29.21  | 29.54       |
| 2020-10-01 | Female sex workers | 45.07                                              | 45.58  | 46.07       | 28.41                                           | 28.73  | 29.05       |
| 2021-01-01 | Female sex workers | 45.17                                              | 45.67  | 46.19       | 27.91                                           | 28.25  | 28.55       |
| 2021-04-01 | Female sex workers | 45.25                                              | 45.78  | 46.33       | 27.40                                           | 27.73  | 28.04       |
| 2021-07-01 | Female sex workers | 45.33                                              | 45.85  | 46.38       | 26.90                                           | 27.22  | 27.54       |
| 2021-10-01 | Female sex workers | 45.40                                              | 45.92  | 46.46       | 26.39                                           | 26.70  | 27.03       |
| 2022-01-01 | Female sex workers | 45.45                                              | 45.98  | 46.49       | 25.87                                           | 26.17  | 26.49       |
| 2022-04-01 | Female sex workers | 45.49                                              | 46.02  | 46.55       | 25.34                                           | 25.63  | 25.94       |
| 2022-07-01 | Female sex workers | 45.54                                              | 46.05  | 46.58       | 24.80                                           | 25.09  | 25.38       |
| 2022-10-01 | Female sex workers | 45.54                                              | 46.07  | 46.57       | 24.25                                           | 24.53  | 24.82       |
| 2023-01-01 | Female sex workers | 45.59                                              | 46.07  | 46.59       | 23.69                                           | 23.97  | 24.25       |
| 2023-04-01 | Female sex workers | 45.55                                              | 46.06  | 46.60       | 23.12                                           | 23.41  | 23.68       |
| 2023-07-01 | Female sex workers | 45.56                                              | 46.05  | 46.56       | 22.55                                           | 22.85  | 23.12       |
| 2023-10-01 | Female sex workers | 45.52                                              | 46.01  | 46.60       | 22.00                                           | 22.28  | 22.54       |
| 2024-01-01 | Female sex workers | 45.47                                              | 45.99  | 46.52       | 21.44                                           | 21.70  | 21.95       |
| 2024-04-01 | Female sex workers | 45.43                                              | 45.94  | 46.48       | 20.86                                           | 21.11  | 21.37       |
| 2024-07-01 | Female sex workers | 45.33                                              | 45.90  | 46.44       | 20.31                                           | 20.53  | 20.78       |
| 2024-10-01 | Female sex workers | 45.28                                              | 45.84  | 46.41       | 19.71                                           | 19.95  | 20.19       |
| 2025-01-01 | Female sex workers | 45.20                                              | 45.77  | 46.32       | 19.14                                           | 19.36  | 19.60       |
| 2025-04-01 | Female sex workers | 45.11                                              | 45.69  | 46.24       | 18.55                                           | 18.77  | 19.00       |
| 2025-07-01 | Female sex workers | 45.05                                              | 45.61  | 46.14       | 17.97                                           | 18.18  | 18.40       |
| 2025-10-01 | Female sex workers | 44.91                                              | 45.53  | 46.05       | 17.38                                           | 17.60  | 17.82       |
| 2026-01-01 | Female sex workers | 44.84                                              | 45.42  | 45.91       | 16.81                                           | 17.01  | 17.22       |
| 2026-04-01 | Female sex workers | 44.72                                              | 45.31  | 45.85       | 16.23                                           | 16.42  | 16.62       |
| 2026-07-01 | Female sex workers | 44.60                                              | 45.19  | 45.72       | 15.64                                           | 15.83  | 16.02       |
| 2026-10-01 | Female sex workers | 44.53                                              | 45.07  | 45.63       | 15.06                                           | 15.25  | 15.43       |
| 2027-01-01 | Female sex workers | 44.40                                              | 44.94  | 45.50       | 14.48                                           | 14.66  | 14.85       |
| 2017-01-01 | Sex clients        | 18.21                                              | 18.30  | 18.39       | 18.21                                           | 18.30  | 18.39       |
| 2017-04-01 | Sex clients        | 18.05                                              | 18.17  | 18.29       | 18.06                                           | 18.17  | 18.29       |

| Time       | Population group | HIV incidence (per 1000 person-years) without PrEP |        |             | HIV incidence (per 1000 person-years) with PrEP |        |             |
|------------|------------------|----------------------------------------------------|--------|-------------|-------------------------------------------------|--------|-------------|
|            |                  | Lower limit                                        | Median | Upper limit | Lower limit                                     | Median | Upper limit |
| 2017-07-01 | Sex clients      | 17.91                                              | 18.05  | 18.18       | 17.91                                           | 18.05  | 18.19       |
| 2017-10-01 | Sex clients      | 17.78                                              | 17.93  | 18.09       | 17.79                                           | 17.93  | 18.07       |
| 2018-01-01 | Sex clients      | 17.67                                              | 17.82  | 17.98       | 17.67                                           | 17.82  | 17.97       |
| 2018-04-01 | Sex clients      | 17.55                                              | 17.72  | 17.88       | 17.55                                           | 17.71  | 17.88       |
| 2018-07-01 | Sex clients      | 17.45                                              | 17.62  | 17.78       | 17.45                                           | 17.62  | 17.78       |
| 2018-10-01 | Sex clients      | 17.35                                              | 17.51  | 17.68       | 17.35                                           | 17.52  | 17.68       |
| 2019-01-01 | Sex clients      | 17.26                                              | 17.41  | 17.58       | 17.15                                           | 17.31  | 17.49       |
| 2019-04-01 | Sex clients      | 17.16                                              | 17.32  | 17.49       | 16.95                                           | 17.11  | 17.29       |
| 2019-07-01 | Sex clients      | 17.07                                              | 17.23  | 17.40       | 16.75                                           | 16.92  | 17.10       |
| 2019-10-01 | Sex clients      | 16.97                                              | 17.14  | 17.30       | 16.57                                           | 16.74  | 16.92       |
| 2020-01-01 | Sex clients      | 16.87                                              | 17.05  | 17.22       | 16.38                                           | 16.57  | 16.74       |
| 2020-04-01 | Sex clients      | 16.80                                              | 16.96  | 17.13       | 16.22                                           | 16.40  | 16.57       |
| 2020-07-01 | Sex clients      | 16.69                                              | 16.87  | 17.04       | 16.05                                           | 16.24  | 16.41       |
| 2020-10-01 | Sex clients      | 16.62                                              | 16.78  | 16.96       | 15.90                                           | 16.08  | 16.26       |
| 2021-01-01 | Sex clients      | 16.53                                              | 16.70  | 16.87       | 15.76                                           | 15.93  | 16.11       |
| 2021-04-01 | Sex clients      | 16.43                                              | 16.61  | 16.78       | 15.60                                           | 15.78  | 15.95       |
| 2021-07-01 | Sex clients      | 16.35                                              | 16.53  | 16.71       | 15.44                                           | 15.63  | 15.80       |
| 2021-10-01 | Sex clients      | 16.27                                              | 16.44  | 16.62       | 15.30                                           | 15.48  | 15.64       |
| 2022-01-01 | Sex clients      | 16.19                                              | 16.36  | 16.54       | 15.14                                           | 15.33  | 15.50       |
| 2022-04-01 | Sex clients      | 16.10                                              | 16.27  | 16.45       | 15.00                                           | 15.17  | 15.34       |
| 2022-07-01 | Sex clients      | 16.01                                              | 16.19  | 16.37       | 14.84                                           | 15.02  | 15.19       |
| 2022-10-01 | Sex clients      | 15.93                                              | 16.11  | 16.29       | 14.70                                           | 14.86  | 15.03       |
| 2023-01-01 | Sex clients      | 15.85                                              | 16.03  | 16.20       | 14.56                                           | 14.71  | 14.87       |
| 2023-04-01 | Sex clients      | 15.78                                              | 15.94  | 16.11       | 14.39                                           | 14.55  | 14.72       |
| 2023-07-01 | Sex clients      | 15.69                                              | 15.86  | 16.02       | 14.23                                           | 14.40  | 14.56       |
| 2023-10-01 | Sex clients      | 15.60                                              | 15.78  | 15.95       | 14.07                                           | 14.23  | 14.39       |
| 2024-01-01 | Sex clients      | 15.53                                              | 15.69  | 15.88       | 13.92                                           | 14.07  | 14.23       |
| 2024-04-01 | Sex clients      | 15.44                                              | 15.61  | 15.80       | 13.76                                           | 13.92  | 14.06       |
| 2024-07-01 | Sex clients      | 15.37                                              | 15.53  | 15.71       | 13.60                                           | 13.76  | 13.90       |
| 2024-10-01 | Sex clients      | 15.28                                              | 15.45  | 15.62       | 13.44                                           | 13.59  | 13.74       |
| 2025-01-01 | Sex clients      | 15.20                                              | 15.37  | 15.55       | 13.27                                           | 13.43  | 13.59       |
| 2025-04-01 | Sex clients      | 15.10                                              | 15.28  | 15.46       | 13.10                                           | 13.27  | 13.41       |
| 2025-07-01 | Sex clients      | 15.02                                              | 15.19  | 15.37       | 12.94                                           | 13.11  | 13.26       |
| 2025-10-01 | Sex clients      | 14.94                                              | 15.11  | 15.29       | 12.78                                           | 12.94  | 13.10       |
| 2026-01-01 | Sex clients      | 14.86                                              | 15.03  | 15.20       | 12.61                                           | 12.78  | 12.94       |
| 2026-04-01 | Sex clients      | 14.77                                              | 14.94  | 15.12       | 12.45                                           | 12.61  | 12.77       |
| 2026-07-01 | Sex clients      | 14.69                                              | 14.86  | 15.03       | 12.29                                           | 12.45  | 12.60       |
| 2026-10-01 | Sex clients      | 14.59                                              | 14.77  | 14.94       | 12.12                                           | 12.28  | 12.43       |
| 2027-01-01 | Sex clients      | 14.51                                              | 14.69  | 14.86       | 11.97                                           | 12.11  | 12.27       |

**Supplementary figures****Supplementary Figure 1. HIV prevalence among FSWs and sex clients from 2010 to 2017 (calibration)**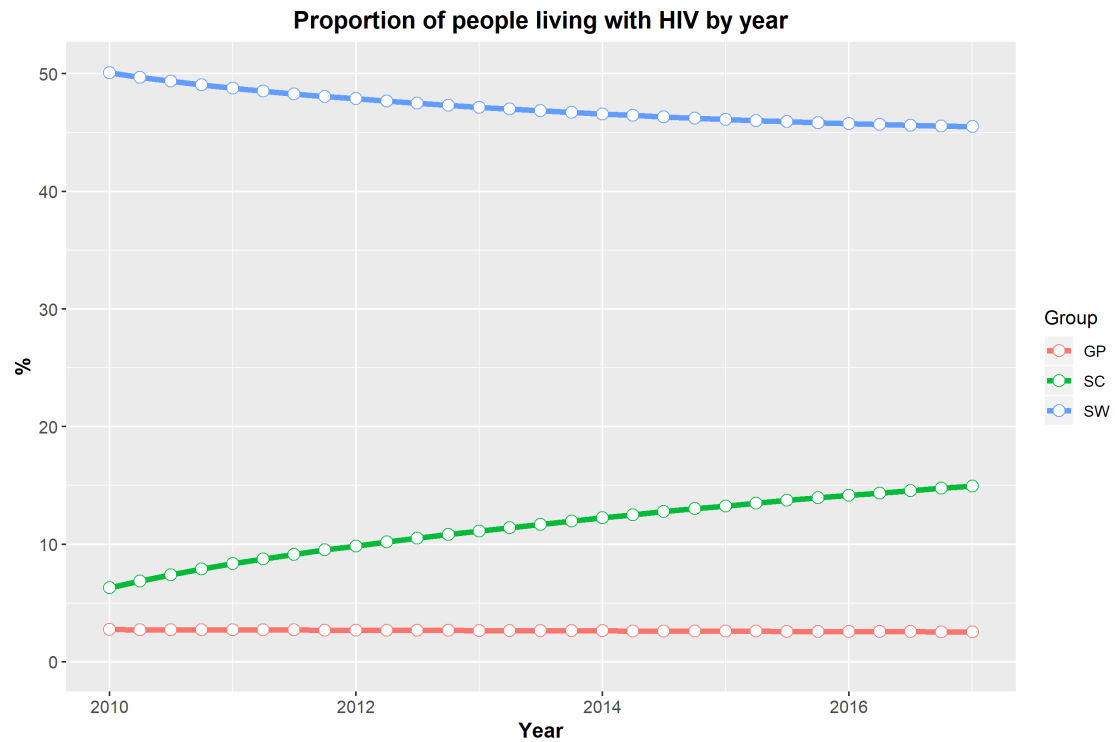

**Acronyms:** GP, general population; SC, sex clients; FSW, female sex workers

**Supplementary Figure 2. Number of FSWs and sex clients living with HIV over time with or without PrEP**

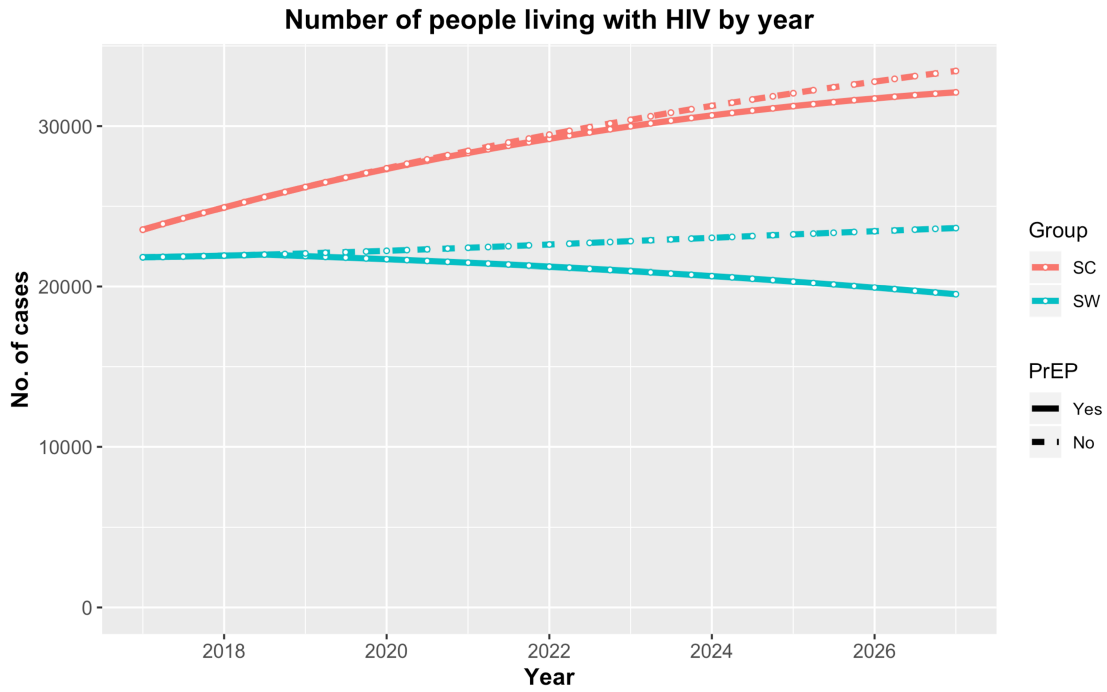

**Acronyms:** PrEP, pre-exposure prophylaxis; SC, sex clients; FSW, female sex workers



**Supplementary Figure 3. Proportion of FSWs and sex clients living with HIV with or without PrEP**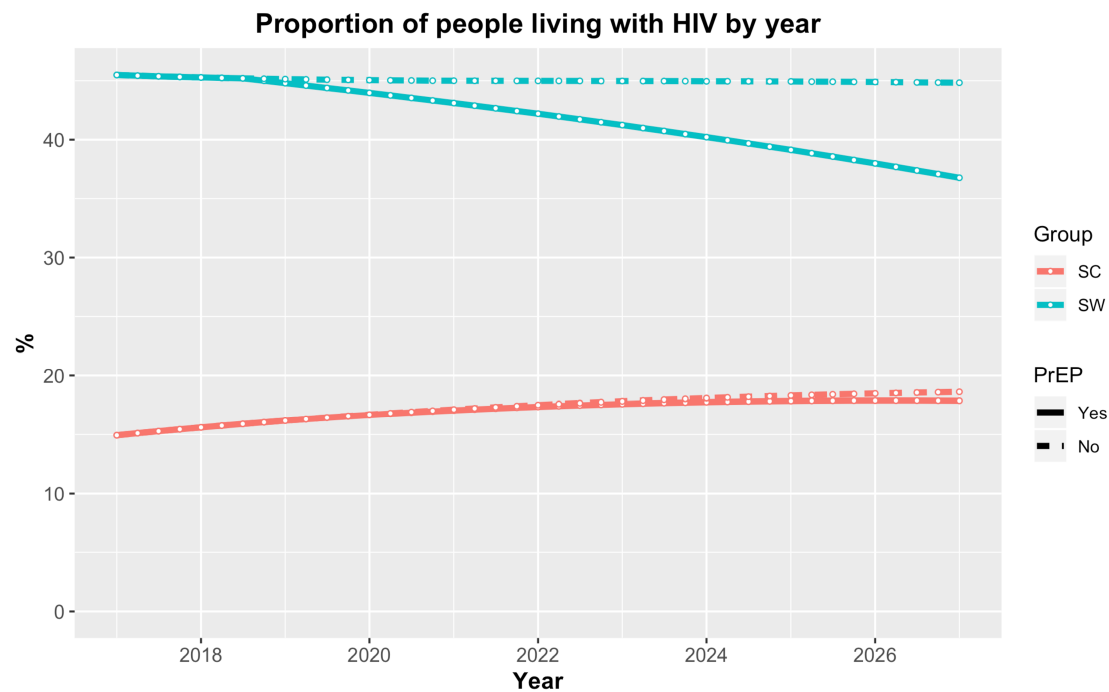

**Acronyms:** PrEP, pre-exposure prophylaxis; SC, sex clients; FSW, female sex workers

**Supplementary Figure 4. Different Markov states of FSWs and sex clients**

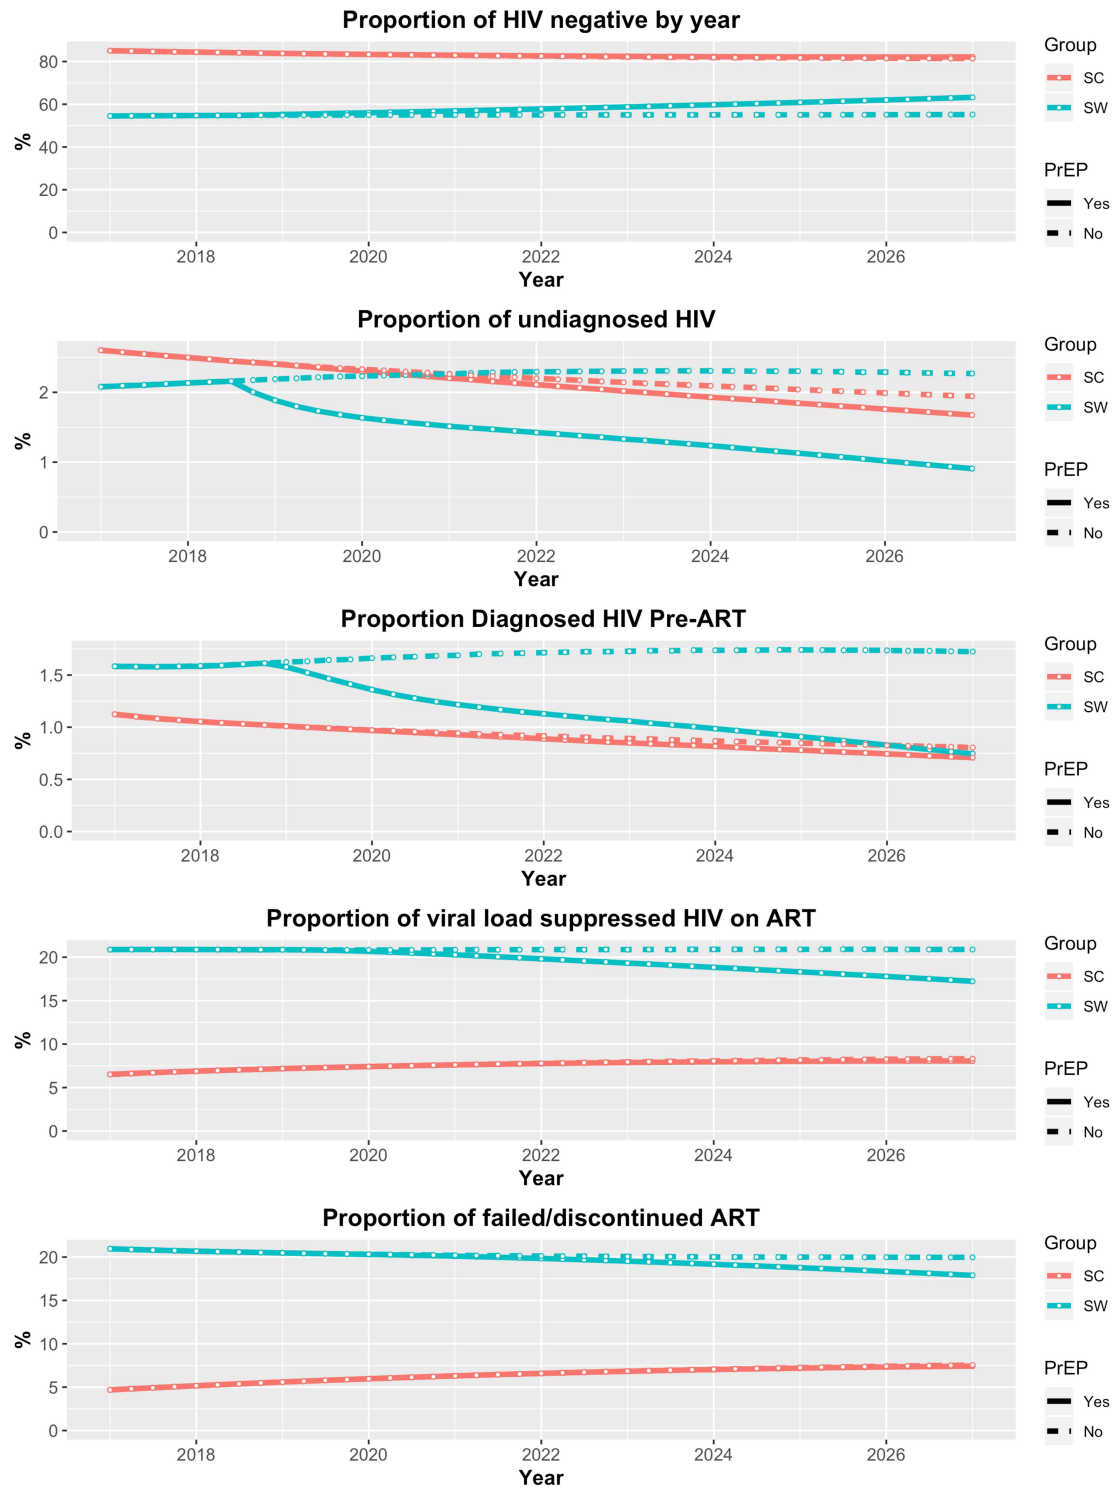

**Supplementary Figure 5. Sensitivity analyses (tornado diagrams) of HIV prevalence for FSWs, clients, and overall population**

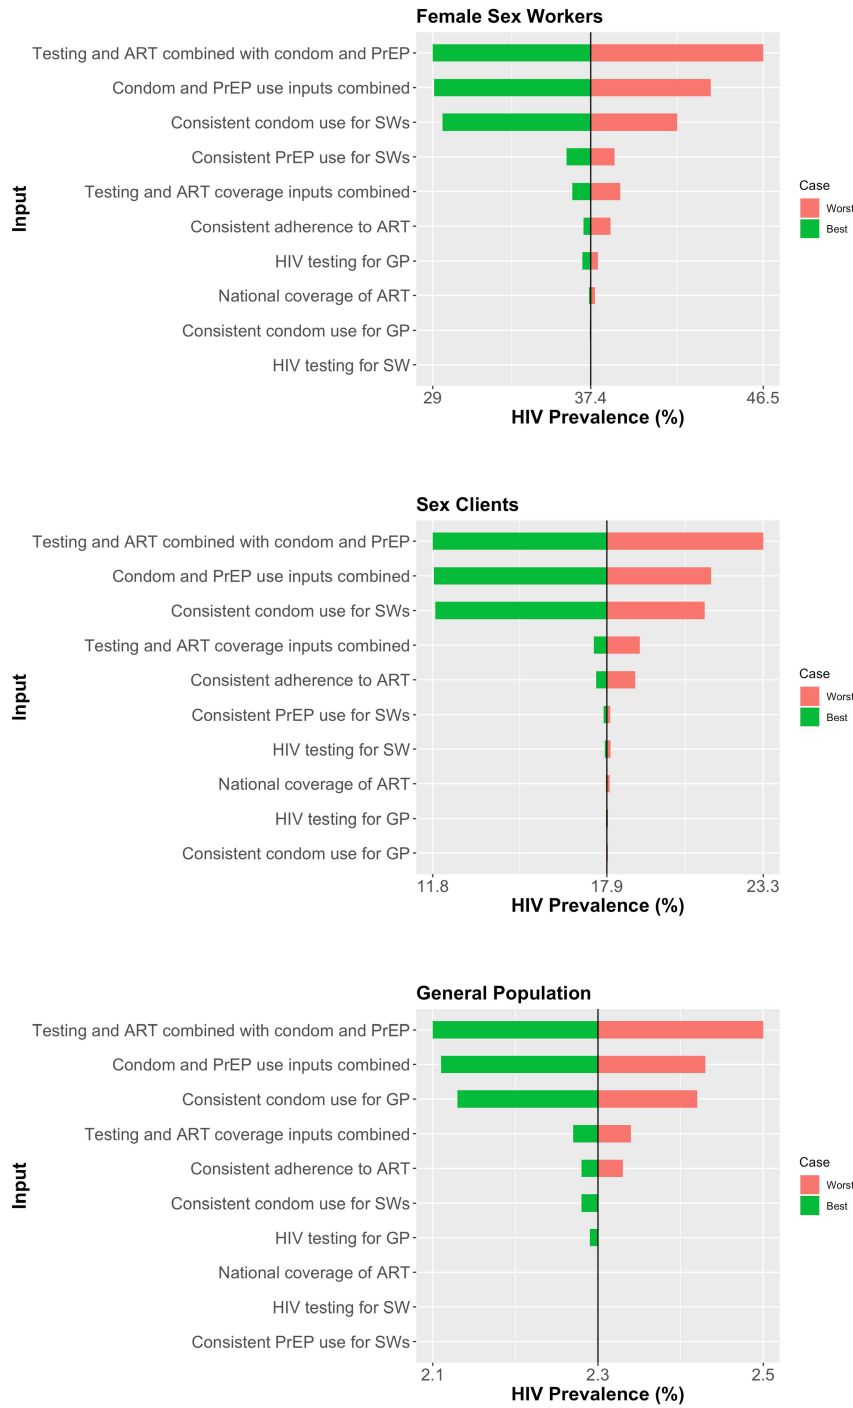

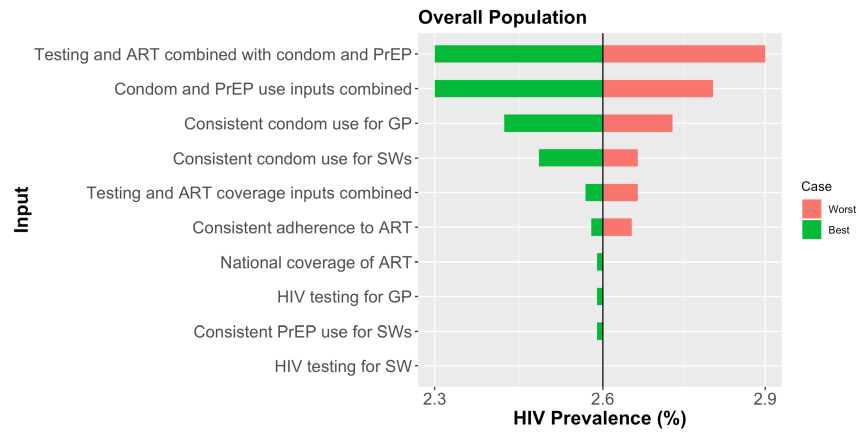

**Legend:** Best-case and worst-case are shown in green and red color, respectively.

**Acronyms:** PrEP, pre-exposure prophylaxis; SW, female sex workers; GP, general population; ART, antiretroviral therapy.

**Supplementary Figure 6. Sensitivity analyses (tornado diagrams) of HIV incidence for FSWs, clients, and overall population**

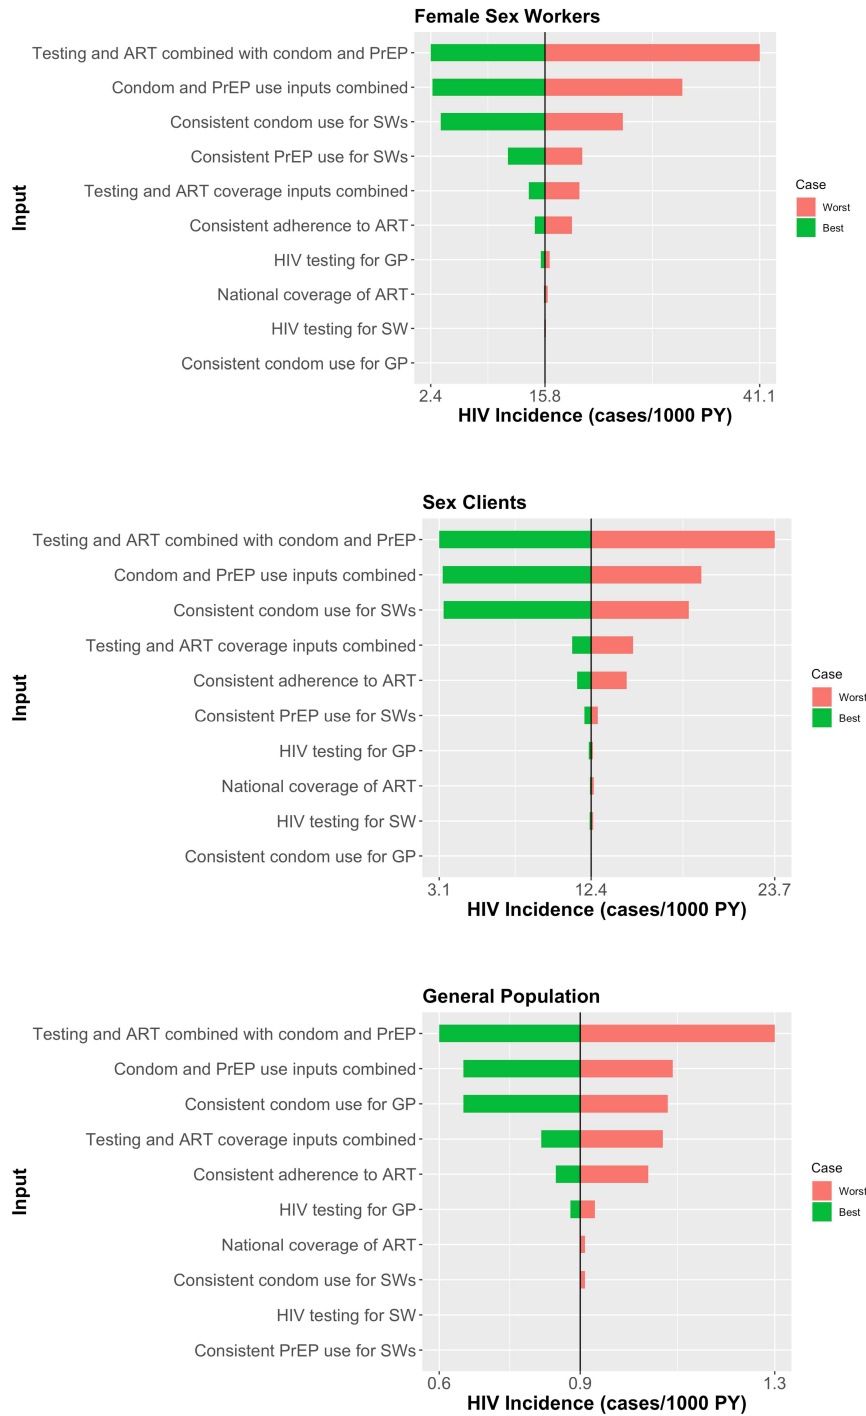

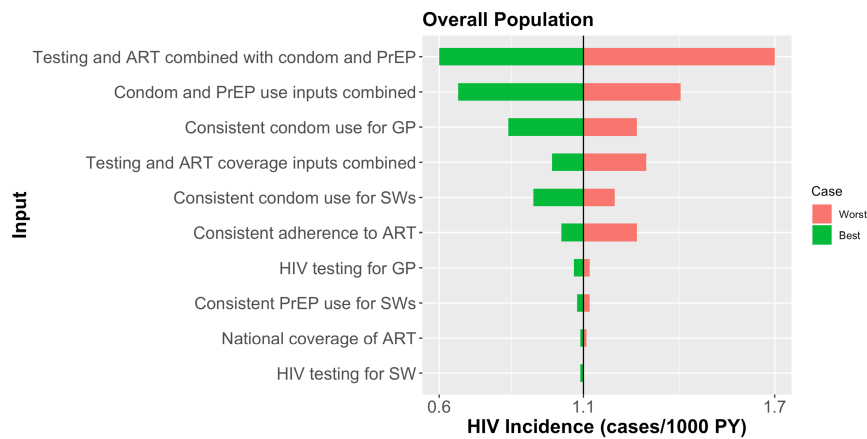

**Legend:** Best-case and worst-case are shown in green and red color, respectively.

**Acronyms:** PrEP, pre-exposure prophylaxis; SW, female sex workers; GP, general population; ART, antiretroviral therapy.

## Supplementary references

1. National Institute of Statistics of Rwanda (NISR) [Rwanda], Ministry of Health (MOH) [Rwanda], and ICF International. 2015. Rwanda Demographic and Health Survey 2014-15. Rockville, Maryland, USA: NISR, MOH, and ICF International.
2. UNAIDS. Country factsheets Rwanda. 2016. <http://www.unaids.org/en/regionscountries/countries/rwanda> (accessed October 31 2017).
3. Nsanzimana S, Remera E, Kanters S, et al. Household survey of HIV incidence in Rwanda: a national observational cohort study. *Lancet HIV* 2017; **4**(10): e457-e64.
4. Mutagoma M, Kayitesi C, Gwiza A, et al. Estimation of the size of the female sex worker population in Rwanda using three different methods. *Int J STD AIDS* 2015; **26**(11): 810-4.
5. Institute of HIV/AIDS Disease Prevention and Control HIV/AIDS, STIs & Other Blood Borne Infections Division. The Behavioral & Biological Surveillance Survey Among Female Sex Workers in Rwanda in 2015. *Rwanda Biomedical Center* 2016.
6. Republic of Rwanda, Ministry of Health. Rwanda AIDS Indicator and HIV Incidence Survey 2013, Key Findings. *Rwanda Biomedical Center* 2015.
7. Nsanzimana S, Kanters S, Remera E, et al. HIV care continuum in Rwanda: a cross-sectional analysis of the national programme. *Lancet HIV* 2015; **2**(5): e208-15.
8. Elul B, Basinga P, Nuwagaba-Biribonwoha H, et al. High levels of adherence and viral suppression in a nationally representative sample of HIV-infected adults on antiretroviral therapy for 6, 12 and 18 months in Rwanda. *PLoS One* 2013; **8**(1): e53586.
9. Weller S, Davis K. Condom effectiveness in reducing heterosexual HIV transmission. *Cochrane Database Syst Rev* 2002; (1): CD003255.
10. Jin F, Crawford J, Prestage GP, et al. Unprotected anal intercourse, risk reduction behaviours, and subsequent HIV infection in a cohort of homosexual men. *AIDS* 2009; **23**(2): 243-52.
11. Remis RS, Alary M, Liu J, Kaul R, Palmer RW. HIV transmission among men who have sex with men due to condom failure. *PloS one* 2014; **9**(9): e107540.
12. Donnell D, Baeten JM, Bumpus NN, et al. HIV protective efficacy and correlates of tenofovir blood concentrations in a clinical trial of PrEP for HIV prevention. *J Acquir Immune Defic Syndr* 2014; **66**(3): 340-8.
13. Wawer MJ, Gray RH, Sewankambo NK, et al. Rates of HIV-1 transmission per coital act, by stage of HIV-1 infection, in Rakai, Uganda. *J Infect Dis* 2005; **191**(9): 1403-9.
14. Jin F, Jansson J, Law M, et al. Per-contact probability of HIV transmission in homosexual men in Sydney in the era of HAART. *AIDS* 2010; **24**(6): 907-13.
15. Baggaley RF, White RG, Boily M-C. HIV transmission risk through anal intercourse: systematic review, meta-analysis and implications for HIV prevention. *International journal of epidemiology* 2010; **39**(4): 1048-63.
